# Supplementary material for: Developing a quality framework for community pharmacy: a systematic review of international literature
Source: PubMed Central journal article supplement (PMC10875530; doi:10.1136/bmjopen-2023-079820), 2024-02-15
Supplement: bmjopen-2023-079820supp001.pdf [file bmjopen-2023-079820supp001.pdf]

## Supplementary File 1 – Database searches

| PubMed |                                                    |              |
|--------|----------------------------------------------------|--------------|
| Search | Query                                              | Items found  |
| #1     | "quality"[Title/Abstract]                          | 1,287,702    |
| #2     | "healthcare quality"[Title/Abstract]               | 3,376        |
| #3     | "health care quality"[Title/Abstract]              | 3,827        |
| #4     | assessment, healthcare quality[MeSH Terms]         | 349,704      |
| #5     | "quality assurance"[Title/Abstract]                | 29,169       |
| #6     | "quality assessment"[Title/Abstract]               | 27,324       |
| #7     | "quality improvement"[Title/Abstract]              | 49,716       |
| #8     | "quality of health care"[Title/Abstract]           | 5,355        |
| #9     | "quality of healthcare"[Title/Abstract]            | 1,915        |
| #10    | #1 OR #2 OR #3 OR #4 OR #5 OR #6 OR #7 OR #8 OR #9 | 1,569,851    |
| #11    | "retail pharmac*"[Title/Abstract]                  | 767          |
| #12    | "community pharmac*"[Title/Abstract]               | 8,652        |
| #13    | "community pharmacy services"[MeSH Terms]          | 5,564        |
| #14    | "pharmacies"[MeSH Terms]                           | 9,347        |
| #15    | #11 OR #12 OR #13 OR #14                           | 18,246       |
| #16    | #10 AND #15<br>from 2005 - 2022                    | <b>2,317</b> |

| Scopus |                                        |              |
|--------|----------------------------------------|--------------|
| Search | Query                                  | Items found  |
| #1     | TITLE-ABS-KEY ( quality )              | 4,526,623    |
| #2     | TITLE-ABS-KEY ( "community pharmac*" ) | 14,435       |
| #3     | TITLE-ABS-KEY ( "retail pharmac*" )    | 1,182        |
| #4     | #8 OR #9                               | 15,432       |
| #5     | #1 AND #4<br>from 2005 – 2022          | <b>2,327</b> |

\*Using TITLE-ABS-KEY “quality” captures: TITLE-ABS-KEY ( "quality improvement" )  
TITLE-ABS-KEY ( "quality assessment" ) TITLE-ABS-KEY ( "quality assurance" ) TITLE-ABS-KEY ( quality W/3 care )

| Embase |                                                   |              |
|--------|---------------------------------------------------|--------------|
| Search | Query                                             | Items found  |
| #1     | (quality adj5 care).ab,kw,ti.                     | 148,342      |
| #2     | "health care quality".mp. or health care quality/ | 264,992      |
| #3     | "healthcare quality".mp.                          | 4243         |
| #4     | "quality improvement".ab,kw,ti.                   | 77715        |
| #5     | "quality assessment".ab,kw,ti.                    | 34799        |
| #6     | "quality assurance".ab,kw,ti.                     | 44810        |
| #7     | quality.ab,kw,ti.                                 | 175,1710     |
| #8     | #1 or #2 or #3 or #4 or #5 or #6 or #7            | 191,6548     |
| #9     | community pharmacy/ or "community pharmac*".mp.   | 23925        |
| #10    | "retail pharmac*".ab,kw,ti.                       | 1422         |
| #11    | #9 OR #10                                         | 24978        |
| #13    | #8 AND #11<br>from 2005-2022                      | <b>3,631</b> |

| CINAHL |                                                                                                                                                                      |              |
|--------|----------------------------------------------------------------------------------------------------------------------------------------------------------------------|--------------|
| Search | Query                                                                                                                                                                | Items found  |
| #1     | (MH "Quality of Care Research") OR (MH "Quality of Health Care") OR (MH "Quality Improvement") OR (MH "Quality Assessment") OR (MH "Quality Assurance") OR "quality" | 603,463      |
| #2     | "community pharmac*"                                                                                                                                                 | 6,041        |
| #3     | (MH "Pharmacy, Retail") OR ""retail pharmac*""                                                                                                                       | 8,275        |
| #4     | #2 OR #3                                                                                                                                                             | 11,488       |
| #5     | #1 AND #4<br>Publication year 2005-2022                                                                                                                              | <b>1,302</b> |

- Using "quality" as a keyword captures (MH "Quality of Care Research") OR (MH "Quality of Health Care") OR (MH "Quality Improvement") OR (MH "Quality Assessment") OR (MH "Quality Assurance")

| PsycINFO |                                                                                                                                         |             |
|----------|-----------------------------------------------------------------------------------------------------------------------------------------|-------------|
| Search   | Query                                                                                                                                   | Items found |
| #1       | exp "Quality of Services"/ or quality.mp. or exp "Quality of Care"/                                                                     | 316648      |
| #2       | "community pharmac*" .mp.                                                                                                               | 1245        |
| #3       | "retail pharmac*" .mp. [mp=title, abstract, heading word, table of contents, key concepts, original title, tests & measures, mesh word] | 143         |
| #4       | 2 or 3                                                                                                                                  | 1366        |
| #5       | 1 and 4<br>Specific range 2005-2022                                                                                                     | <b>207</b>  |

- Mapping the search term "quality" to "quality of services" and "quality of care", covers: (quality adj5 care) OR "quality assessment" OR "quality improvement" OR "quality assurance"

| Web of Science |                                          |              |
|----------------|------------------------------------------|--------------|
| Search         | Query                                    | Items found  |
| #1             | quality (Topic)                          | 3,205,809    |
| #2             | "community pharmac*" (Topic)             | 10,595       |
| #3             | "retail pharmac*" (Topic)                | 823          |
| #4             | #2 OR #3                                 | 11,310       |
| #5             | #1 AND #4<br>Publication years 2005-2022 | <b>1,794</b> |

- Using "quality (Topic)" covers: (quality) NEAR/3 (care or healthcare) (Topic) OR "quality assessment" (Topic) OR "quality improvement" (Topic) OR "quality assurance" (Topic)
